# Supplementary material
Source: publisher site journal article supplement (https://www.dovepress.com/article/562091)
Supplement: Supplementary file 1 [file 562091%20Revised%20Supplementary%20Materials.docx]

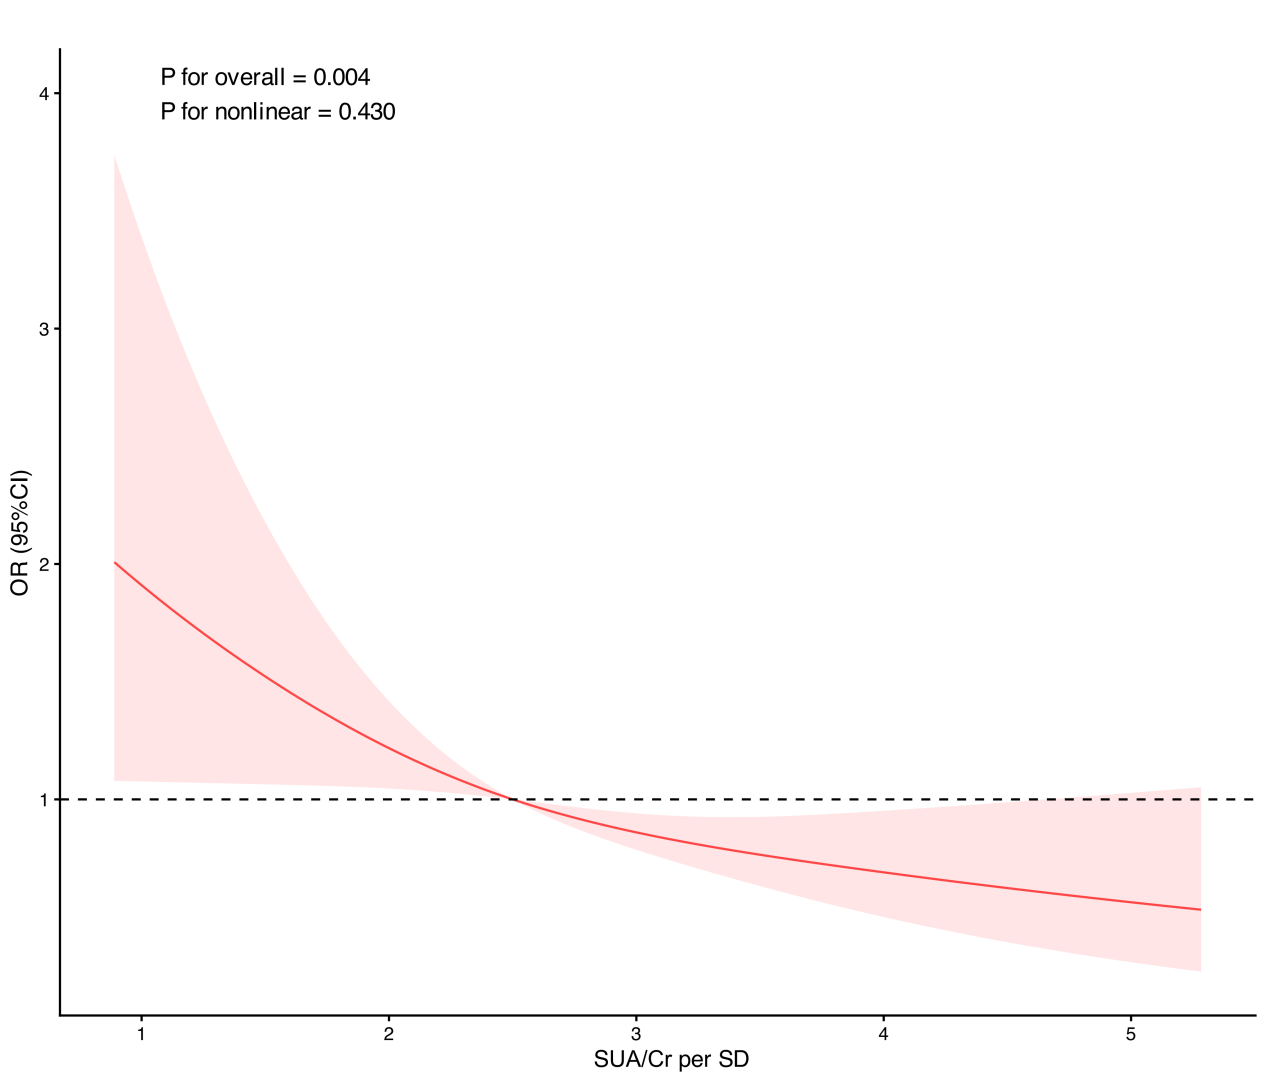


**Supplemental Figure S1:** Restricted cubic splines (RCS) analysis between SUA/Cr per SD and sudomotor dysfunction in multivariable-adjusted model. Multivariable-adjusted model was adjusted for the risk factors including age, sex, body mass index, diastolic blood pressure, smoking, triglyceride, high-density lipoprotein cholesterol, diabetes duration, and fasting plasma glucose.


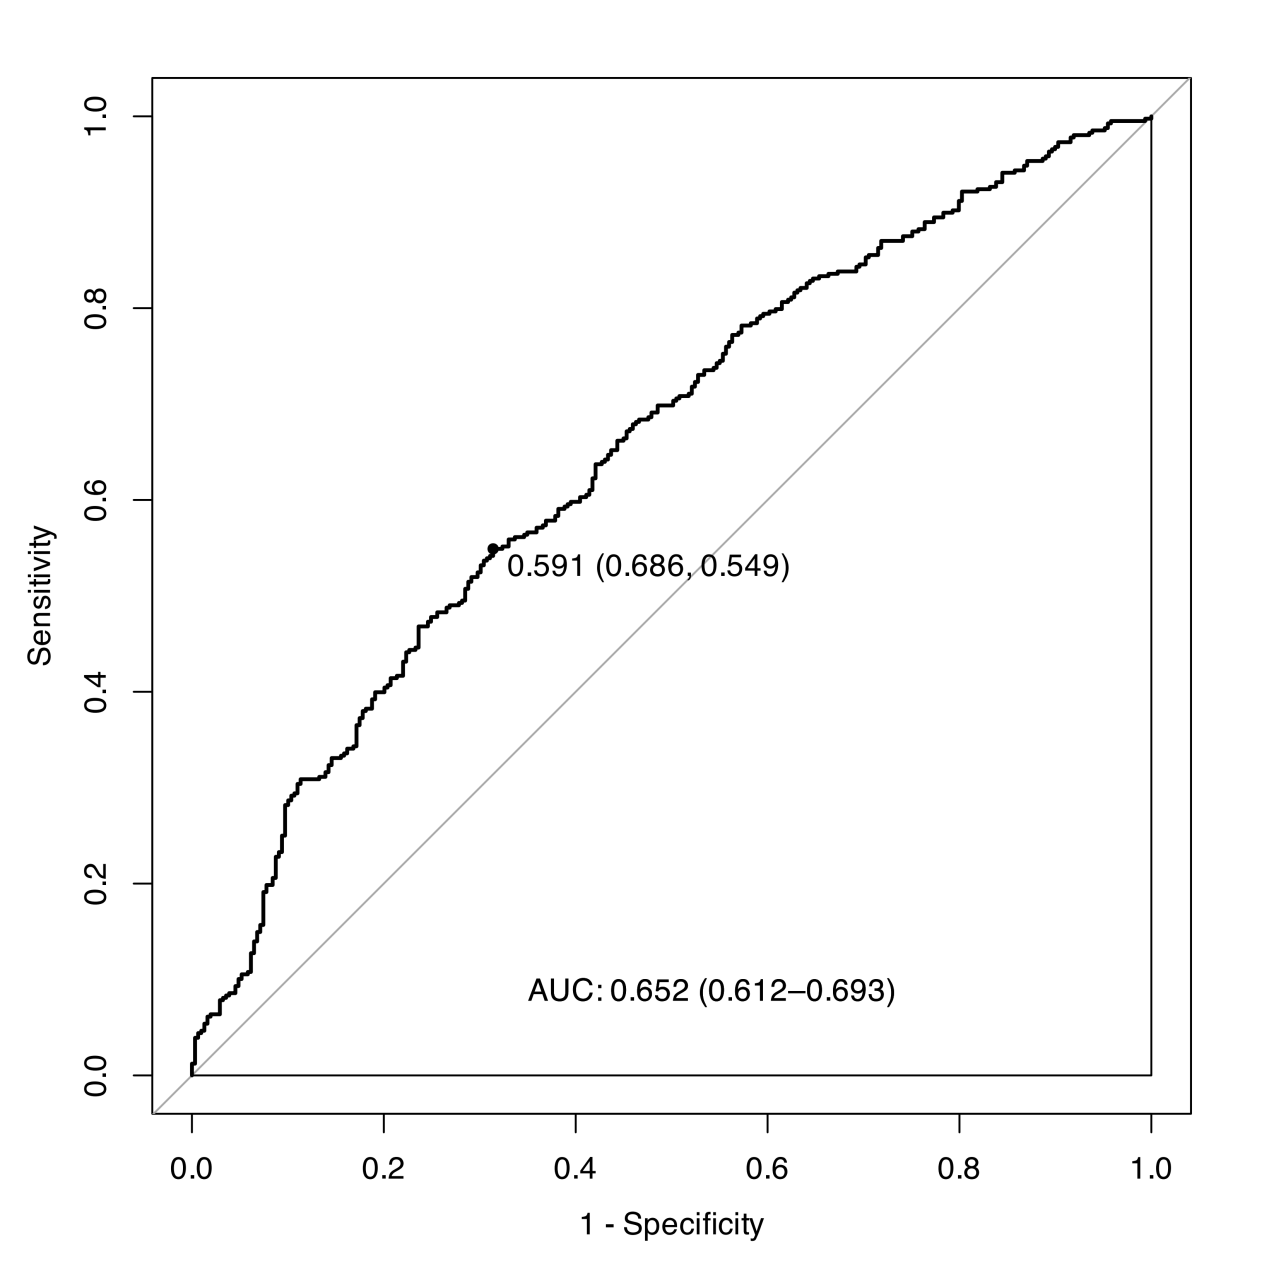


**Supplemental Figure S2:** Receiver-operating characteristic (ROC) curve analysis for predictive values of SUA/Cr in detecting sudomotor dysfunction in patients with T2DM.


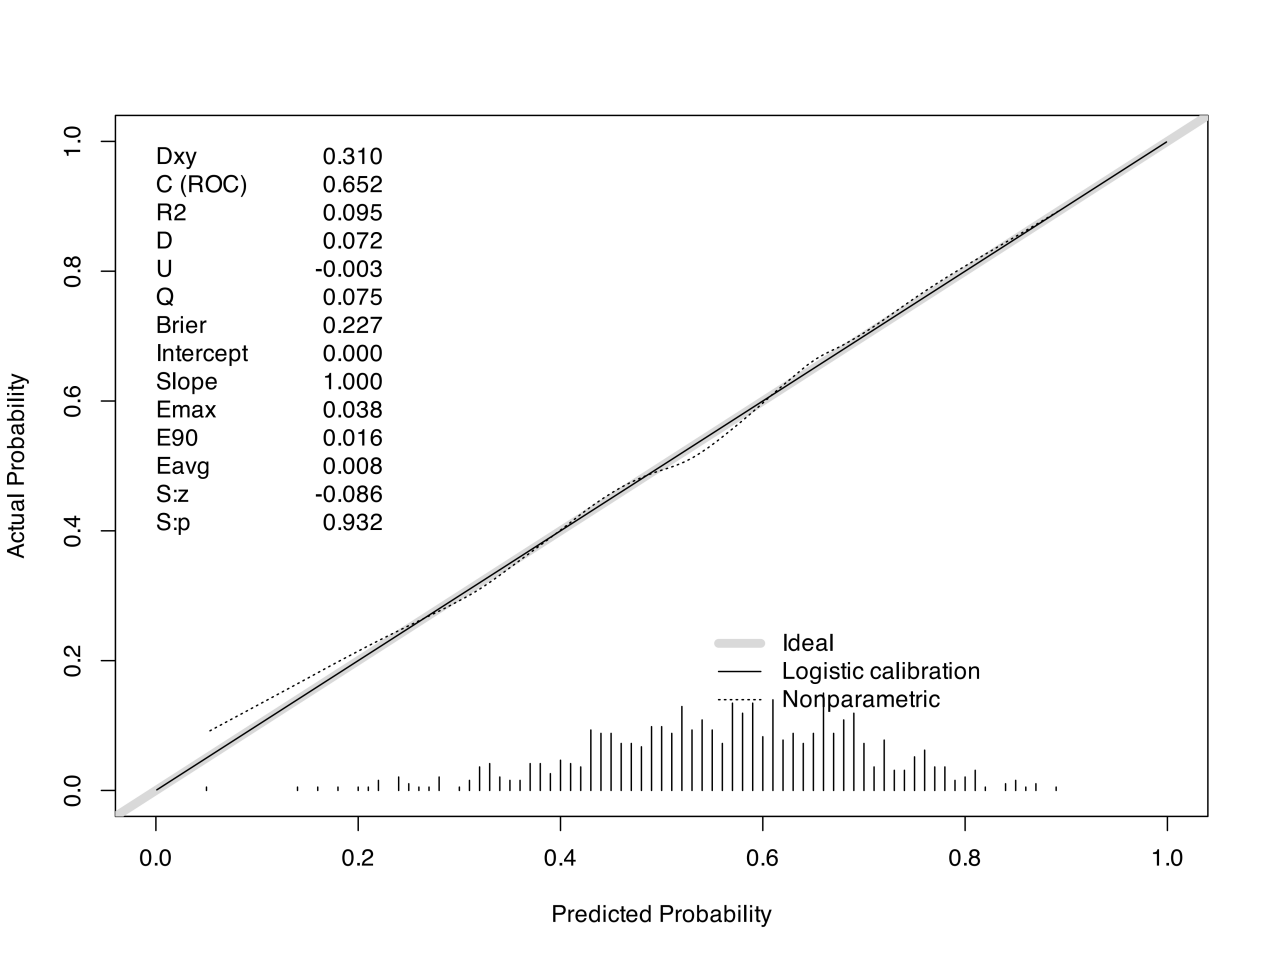


**Supplemental Figure S3:** Calibration Plot of the prediction model for sudomotor dysfunction in patients with T2DM

**Table S1. Multicollinearity analysis for HESC and FESC as dependent variable, respectively**

| Variable | HESC | FESC |
| --- | --- | --- |
| VIF | VIF |
| SUA/Cr ratio | 1.245 | 1.245 |
| Age (years) | 1.535 | 1.535 |
| Sex (Men, % ) | 1.352 | 1.352 |
| Diabetes duration (year) | 1.326 | 1.326 |
| Body mass index (kg/m2) | 1.248 | 1.248 |
| Systolic blood pressure (mmHg) | 1.103 | 1.103 |
| Smoking (%) | 1.201 | 1.201 |
| Triglycerides (mmol/L) | 1.200 | 1.200 |
| HDL-C (mmol/L) | 1.260 | 1.260 |
| FPG (mmol/L） | 1.061 | 1.061 |

A VIF value exceeding 5 indicates potential multicollinearity. HESC, hand electrochemical skin conductance; FESC, foot electrochemical skin conductance; SUA, serum uric acid; Cr, creatinine; HDL-C, high-density lipoprotein cholesterol; FPG, fasting plasma glucose.
